# Supplementary material for: Abdominal aortic calcification can predict all-cause mortality and CV events in dialysis patients: A systematic review and meta-analysis
Source: PubMed Central journal article supplement (PMC6150537; doi:10.1371/journal.pone.0204526), 2018-09-21
Supplement: pone.0204526.s004.pdf [file pone.0204526.s004.pdf]

**S4 Table. Raw Data of Included Studies**

| Study/year       | Region                            | Design        | Patients | Sample size (% men) | Age (Mean) | Detection Methods                | Scoring Methods | Comparison of AAC                                | Events Number HR (95% CI)                                                                                             | Follow-up (months) | Adjustment for Covariates                                        | Risk of bias according to ROBINS-I |
|------------------|-----------------------------------|---------------|----------|---------------------|------------|----------------------------------|-----------------|--------------------------------------------------|-----------------------------------------------------------------------------------------------------------------------|--------------------|------------------------------------------------------------------|------------------------------------|
| Makela2018[12]   | Sweden, Finland, Denmark, Estonia | Prospective   | PD       | 249 (66.7)          | 61         | Plain lateral lumbar X-ray       | AAC-24          | Grade3(7-24) VS. Grade2(1-6) VS. Grade1(Absence) | all death (91), 4.85(1.09-21.63), 2.22(0.44-11.18); new CV events (include CV death) 2.59(1.00-6.72); 2.30(0.84-6.34) | 46                 | age, gender, BMI, DM, ABI, ALB                                   | Moderate                           |
| Wang2017[23]     | China                             | Prospective   | HD       | 170                 | NS         | lateral abdominal radiograph     | AAC-24          | High VS. low (AAC≥5 VS. AAC<5)                   | All death 4.373 (1.562-7.246)                                                                                         |                    |                                                                  | Moderate                           |
| Rroji2017[22]    | Albania                           | NS            | PD, HD   | 126                 | 62.6       | Lateral lumbar spine radiograph  | AAC-24          | High VS. low (AAC≥7 VS. AAC<7)                   | CV death 2.25 (1.77-5.58)                                                                                             |                    |                                                                  | Moderate                           |
| NasrAllah2016[9] | Egypt                             | Prospective   | HD       | 93 (48.3)           | 42.7       | Lateral lumbar spine radiographs | AAC-24          | Presence VS. absence                             | All death (28) 1.2 (0.4–4)                                                                                            | 46.8               | NS                                                               | Moderate                           |
| Kwon2014[14]     | Korea                             | Retrospective | HD       | 112 (43.5)          | 59         | left lumbar spine radiograph     | AAC-24          | High VS. low (mean AAC 8)                        | All death (18)4.205 (1.658–10.669); CV events (include CV death) 1.801(1.281–2.531)                                   | 32.8               | CCI score, ESRD&HD durations, Coronary score, CRP, Ca, LDL, iPTH | Low                                |
| Yoon2013[24]     | Korea                             | Retrospective | PD       | 92 (52.2)           | 55         | abdominal CT scan                | ACI             | High VS low (mean AAC18.9)                       | All death (30) and CV events 5.25(1.77 – 15.58)                                                                       | 35.3               | age, DM, pre-CVD, HB, ALB, CRP, LAD, ejection fraction           | Moderate                           |
| Martino2013[20]  | Italy                             | Prospective   | PD       | 72 (60.8)           | NS         | left lateral plain radiograph    | AAC-24          | Grade3 (>12) VS Grade2(6-12) VS Grade1(<6)       | CV events (include CV death) 0.7(3.562–264.841); 3.918(0.419-36.668)                                                  | 30.5               | age, urine output                                                | Serious                            |
| Hong2013[21]     | China                             | Retrospective | HD       | 217 (49.8)          | 60         | lateral abdominal radiograph     | AAC-24          | Presence VS. absence                             | All death (37) 4.47(1.55-12.92) CV death (23) 2.86(0.93-8.81)                                                         | 26                 | age, DM, P, ALB, HP, Kt/V, PP                                    | Moderate                           |
| Verbeke2011[15]  | European                          | Prospective   | PD, HD   | 1076                | 61.9       | plain lateral lumbar radiograph  | AAC-24          | Grade3(<5) VS Grade2(5-15) VS Grade1(<5)         | All death (234) and CV events 8.640(3.528-21.158); 3.682(1.356-9.997)                                                 | 24                 | age, DM, ALB                                                     | Moderate                           |
| Okuno2007[16]    | Japan                             | cohort study  | HD       | 515 (59.4)          | 60.1       | left lateral abdomen radiograph  | AAC-24          | Presence VS. absence                             | All death (103) 2.07(1.21-3.56); CV death (41) 2.39(1.01-5.66)                                                        | 51                 | age, HD duration, DM, BMI, ALB, CRE, P, CRP                      | Moderate                           |
